# Supplementary material
Source: publisher figshare collection journal article supplement (https://gsapubs.figshare.com/ndownloader/files/35999732)
Supplement: Supplementary file 1 [file 35999732]

## Sheet: Sheet1
Table S4. Whole-rock geochemistry data for 7 Yongli carbonatite samples
Sample	SiO2	Al2O3	TiO2	Fe2O3	FeO	CaO	MgO	K2O	Na2O	MnO	P2O5	H2O+	H2O-	LOI	Total
NJG-1	2.2	0.54	0.02	0.09	0.12	53.82	0.52	0.1	0.02	0.025	0.021	0.28	0.1	42.43	99.91
NJG-2	0.34	0.1	0.01	0.01	0.07	55.63	0.16	0.02	0.02	0.021	0.005	0.31	0.04	43.43	99.83
NJG-3	1.09	0.13	0.01	0.03	0.12	55.18	0.17	0.04	0.03	0.005	0.009	0.23	0.04	43.07	99.88
NJG-4	3.66	0.23	0.01	0.02	0.11	55.71	0.27	0.04	0.03	0.019	0.01	0.46	0.07	39.75	99.85
NJG-5	0.65	0.05	0.01	0.04	0.05	55.62	0.2	0.02	0.02	0.023	0.006	0.23	0.06	43.2	99.88
NJG-6	1.44	0.057	0.01	0.003	0.11	54.64	0.53	0.02	0.02	0.005	0.009	0.46	0.06	43.01	99.86
NJG-7	1	0.55	0.02	0.06	0.41	47.44	6.92	0.04	0.05	0.028	0.004	0.27	0.11	43.32	99.84
Sample	Y	La	Ce	Pr	Nd	Sm	Eu	Gd	Tb	Dy	Ho	Er	Tm	Yb	Lu
NJG-1	3.24	1.87	19.3	0.81	1.85	1.83	0.084	0.33	0.076	2.1	0.08	0.19	0.072	0.31	0.039
NJG-2	2.58	0.62	6.06	0.53	0.57	0.81	0.083	0.14	0.048	0.83	0.051	0.092	0.06	0.23	0.027
NJG-3	3.72	1.74	15.8	0.73	1.41	1.63	0.062	0.31	0.076	2.2	0.088	0.21	0.077	0.34	0.044
NJG-4	3.6	0.92	9.68	0.6	0.94	1.21	0.065	0.23	0.068	1.97	0.082	0.2	0.073	0.31	0.038
NJG-5	2.75	0.74	7.53	0.56	0.72	1.02	0.074	0.18	0.055	1.09	0.055	0.1	0.061	0.23	0.028
NJG-6	2.97	0.76	7.7	0.56	0.73	1.04	0.053	0.18	0.057	1.28	0.064	0.13	0.064	0.25	0.03
NJG-7	4.52	1.67	17.3	0.76	1.58	1.81	0.098	0.35	0.085	2.87	0.11	0.27	0.086	0.39	0.051
Sample	Li	Be	Sc	V	Cr	Co	Ni	Cu	Zn	Ga	As	Rb	Sr	Zr	Nb
NJG-1	6.99	0.52	0.69	7.66	4.45	1.35	10.2	2.41	3.57	1.06	2.56	5.95	495	66.8	1.83
NJG-2	1.47	0.17	0.31	5.39	1.49	0.99	9.81	1.38	2.36	0.46	2.41	1.18	1409	56.4	1.18
NJG-3	2.22	0.32	0.25	4.94	2.57	1.13	10.1	1.67	3.63	0.51	2.71	1.27	1043	63.9	0.96
NJG-4	8.4	0.33	0.27	4.9	2.3	1.1	10.4	1.88	1.65	0.61	2.06	0.89	1537	56.4	0.91
NJG-5	1.4	0.13	0.21	5.26	1.89	0.96	9.54	1.48	2.13	0.39	2.26	0.22	1143	57.7	0.34
NJG-6	1.79	0.14	0.25	5.97	1.58	1.25	11.6	1.83	3.45	0.37	2.88	0.42	1558	55.5	0.4
NJG-7	8.64	0.18	0.53	4.13	4.46	1.04	8.68	1.9	16.3	0.67	2.51	1.49	1078	79.1	1.2
Sample	Mo	In	Cs	Ba	Hf	Ta	W	Tl	Pb	Bi	Th	U
NJG-1	0.28	0.015	0.87	49	8.3	0.61	0.25	0.14	1.52	0.022	1.5	1.28
NJG-2	0.09	0.015	0.62	179	6.45	0.57	0.19	0.049	0.49	0.011	0.87	0.39
NJG-3	0.042	0.014	0.65	32.6	7.4	0.59	0.19	0.046	1.19	0.016	1.15	0.36
NJG-4	0.22	0.014	0.69	54.6	6.35	0.4	0.096	0.053	0.56	0.012	0.9	0.41
NJG-5	0.049	0.014	0.63	67.9	6.24	0.12	0.066	0.038	0.67	0.012	0.83	0.67
NJG-6	0.081	0.015	0.64	73.8	6.05	0.18	0.05	0.039	1.65	0.012	0.85	0.59
NJG-7	0.12	0.018	0.84	103	9.12	0.37	0.16	0.048	1.19	0.015	1.02	0.66
